# Supplementary material for: Oral citrate supplementation mitigates age-associated pathological intervertebral disc calcification in LG/J mice
Source: PubMed Central journal article supplement — bioRxiv. 2024 Jul 19:2024.07.17.604008. Preprint. [Version 1] doi: 10.1101/2024.07.17.604008 (PMC11275755; doi:10.1101/2024.07.17.604008), 2024-07-19
Supplement: NIHPP2024.07.17.604008v1-supplement-3.pdf [file NIHPP2024.07.17.604008v1-supplement-3.pdf]

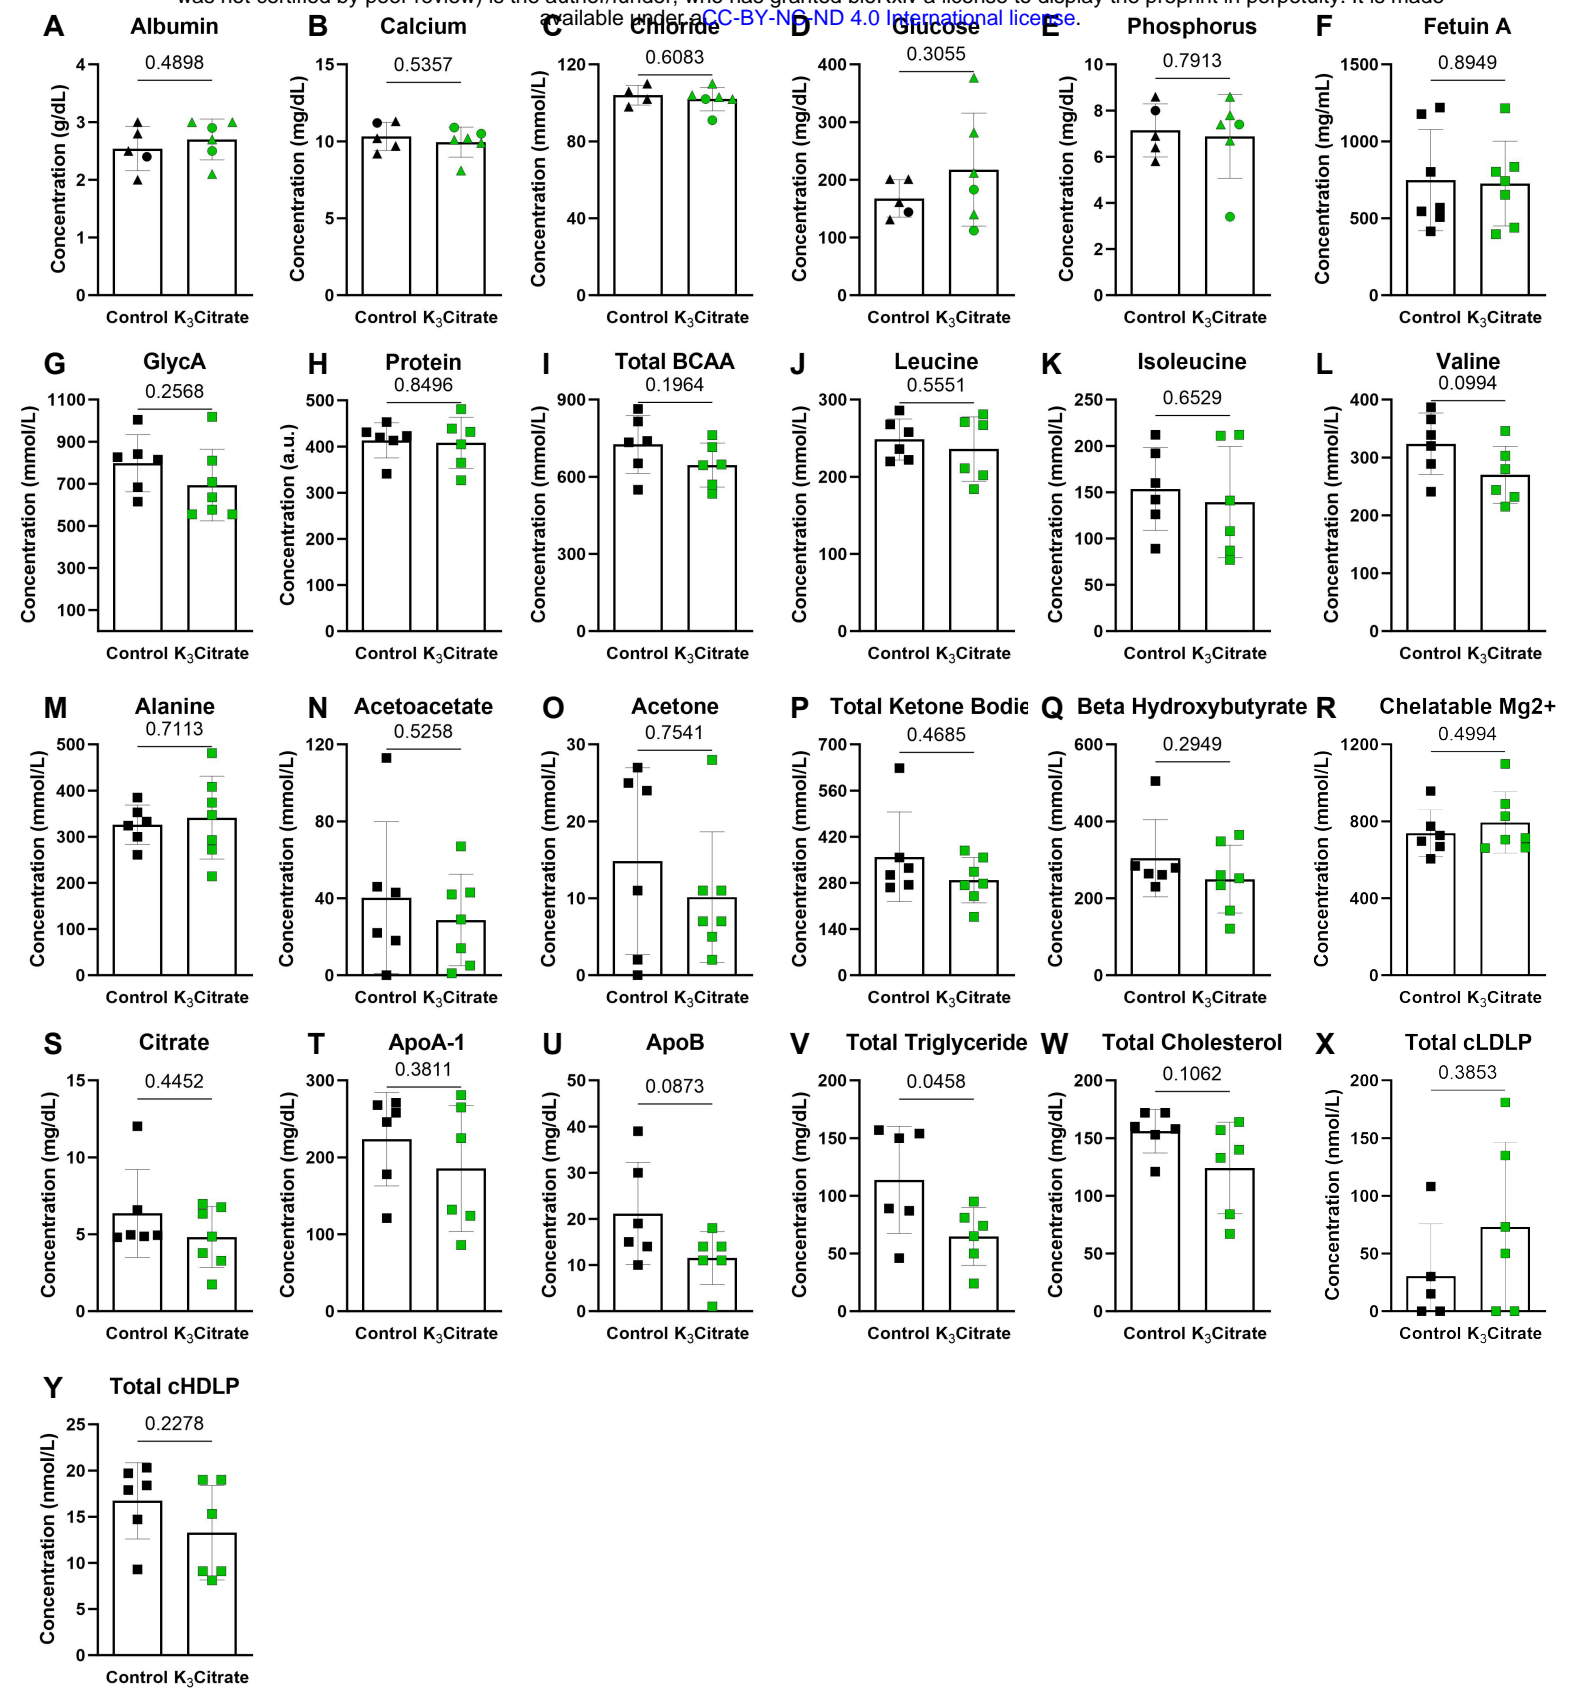

### **Supplementary Figure 1. Plasma chemistry is stable with K<sub>3</sub>Citrate**

**supplementation in LG/J mice. (A)** Albumin, **(B)** Calcium, **(C)** Chloride, **(D)** Glucose, and **(E)** Phosphorus were analyzed using an IDEXX BioAnalytics custom blood chemistry panel (Control: n=5 mice (1F, 4M); K<sub>3</sub>Citrate: n=6 mice (2F, 4M)). **(F)** Fetuin-A, an inhibitor of mineralization, showed no differences across groups (Control: n=7 mice (2F, 5M); K<sub>3</sub>Citrate: n=7 mice (3F, 4M)). **(G)** GlycA, **(H)** Protein, **(I)** total branched chained amino acids (BCAA), **(J)** Leucine, **(K)** Isoleucine, **(L)** Valine, **(M)** Alanine, **(N)** Acetoacetate, **(O)** Acetone, **(P)** Total Ketone Bodies, **(Q)** Beta Hydroxybutyrate, **(R)** Chelatable Mg<sup>2+</sup>, **(S)** Citrate, **(T)** ApoA-1, **(U)** ApoB, **(V)** Total Triglyceride, **(W)** Total Cholesterol, **(X)** total calibrated low-density lipoprotein particle (cLDLP), and **(Y)** total calibrated high-density lipoprotein particle (cHDLP) were measured using NMR at LabCorp Global Research Services, and showed no changes with K<sub>3</sub>Citrate supplementation (Control: n=6 mice (1F, 5M); K<sub>3</sub>Citrate: n=7 mice (3F, 4M)). Sample size varied between assays based on the volume of plasma required and the volume of plasma collected from each mouse. Significance was determined using an unpaired t-test or Mann-Whitney test, as appropriate.

**A**

Thematic enrichment from downregulated DEGs

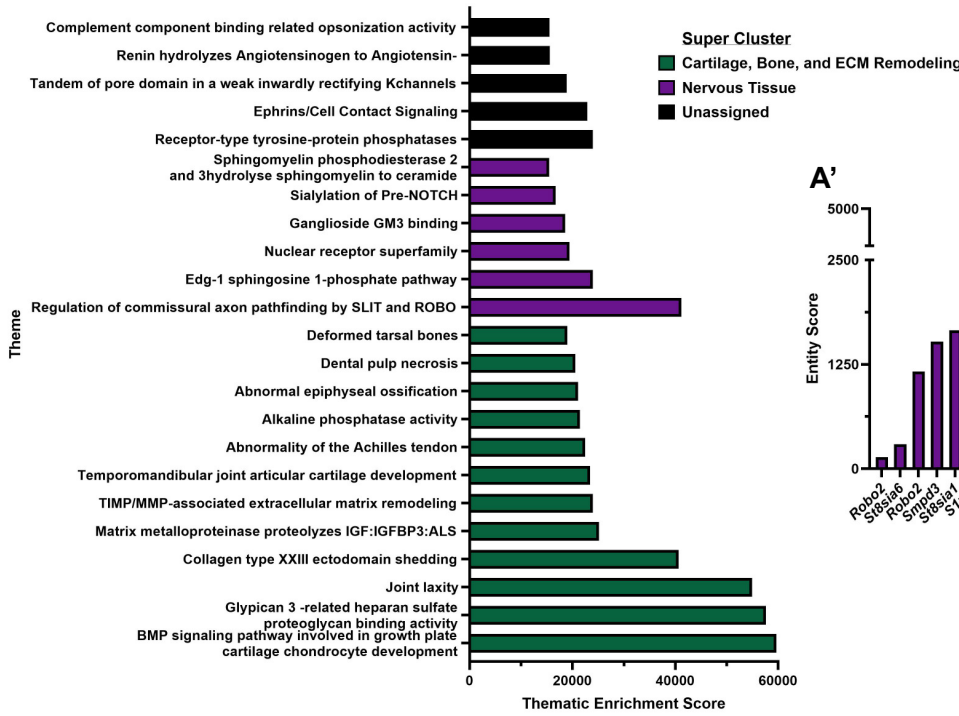

**A'**

Downregulated Transcripts with Highest Entity Scores

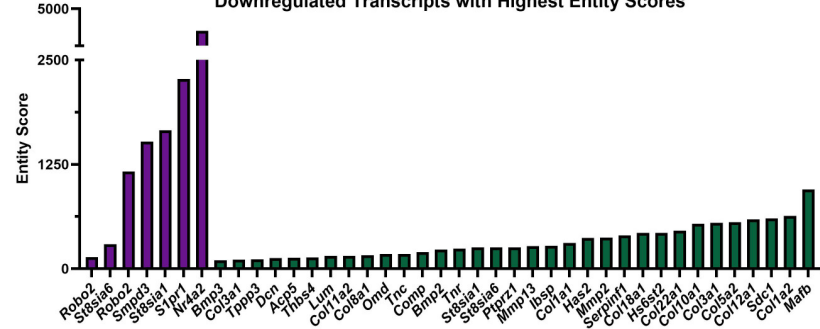

**B**

Thematic enrichment from upregulated DEGs

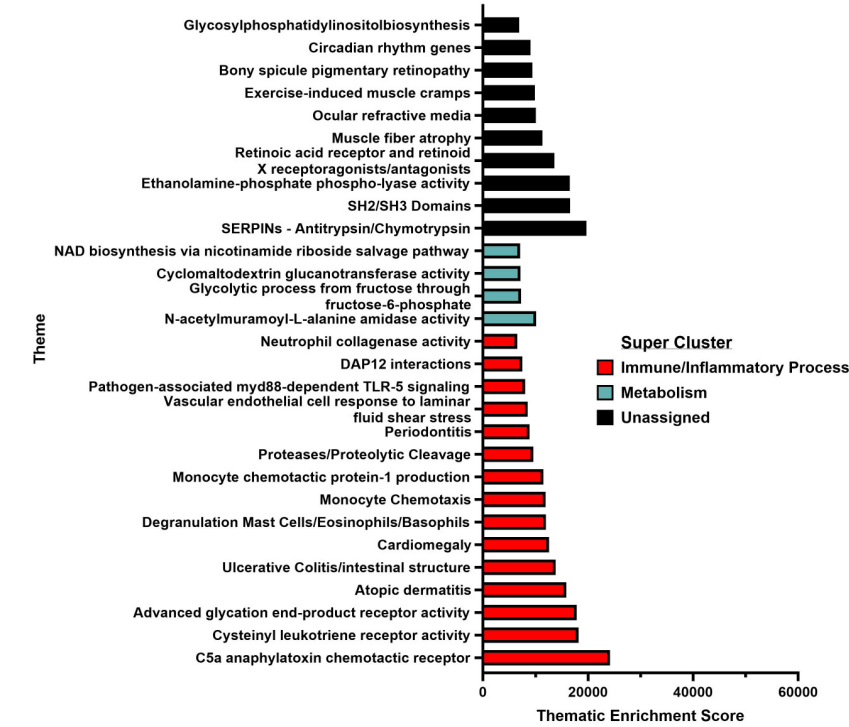

**Supplementary Figure 2. Analysis of upregulated DEGs and most enriched downregulated transcripts. (A)** RNA-sequencing analysis shows downregulated DEGs have high thematic enrichment. **(A')** Transcripts within each super cluster that have the highest entity scores (cutoff of 100). **(B)** RNA-sequencing analysis shows upregulated DEGs have high thematic enrichment. (Control: n=4 mice (1F, 3M); K<sub>3</sub>Citrate: n=7 mice (2F, 2M))

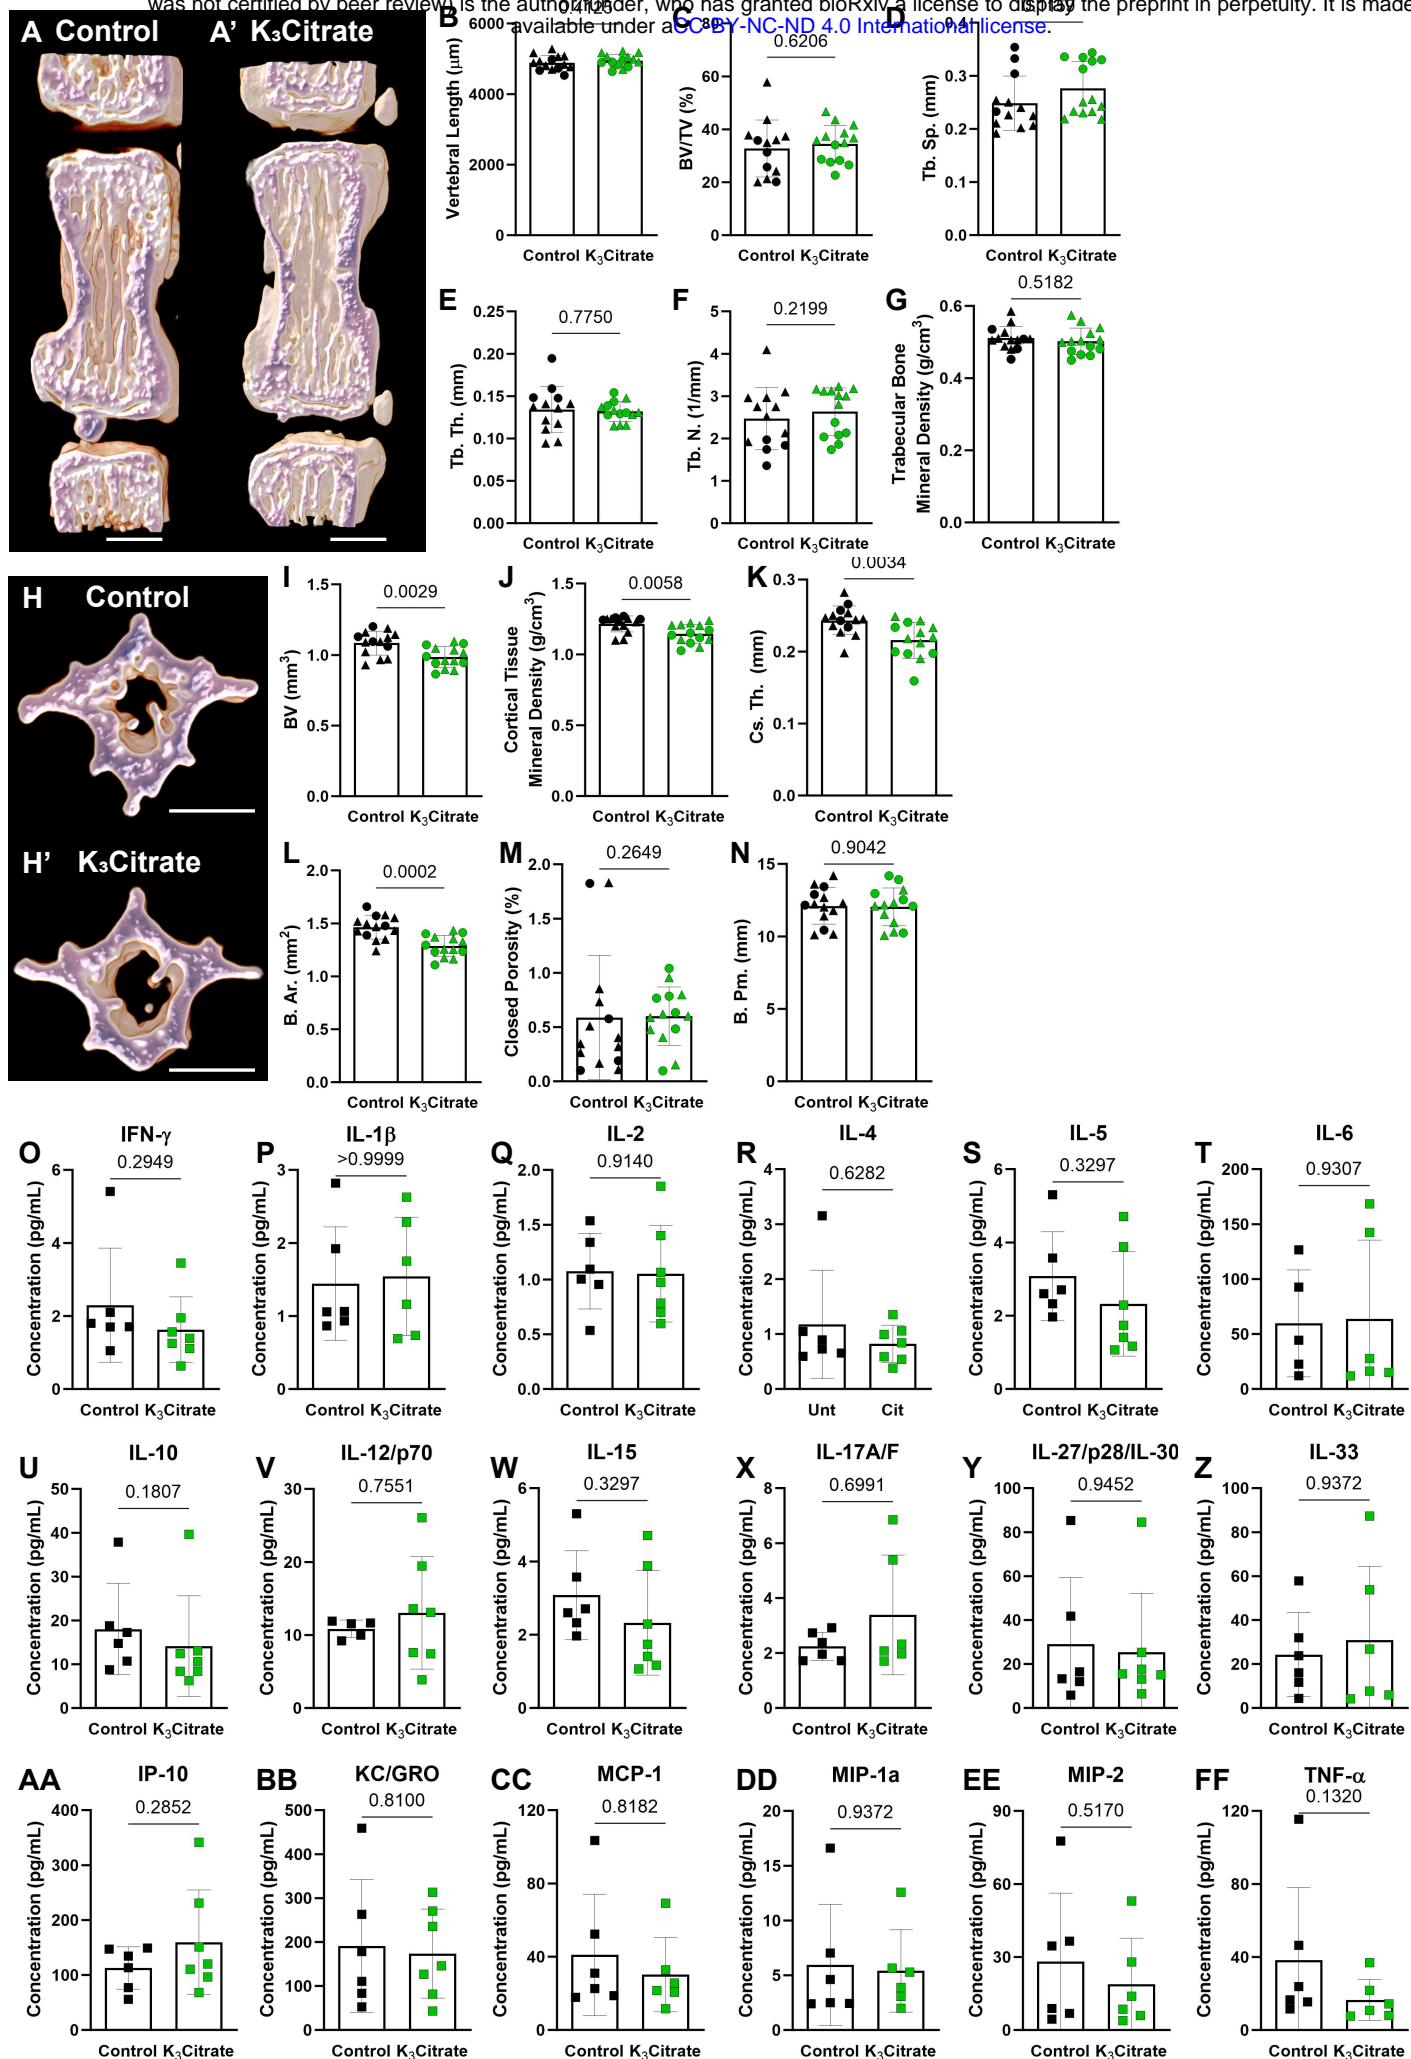

**Supplementary Figure 3. K<sub>3</sub>Citrate supplementation minimally impacts the caudal vertebrae in LG/J mice. (A-A')** Representative  $\mu$ CT reconstructions of the hemi-section caudal motion segments., and **(B)** vertebral length was unchanged. Trabecular properties of **(C)** bone volume fraction (BV/TV), **(D)** trabecular separation (Tb. Sp.), **(E)** trabecular number (Tb. N.), **(F)** trabecular thickness (Tb. Th.), and **(G)** trabecular bone mineral density were unchanged in K<sub>3</sub>Citrate mice. **(H-H')** Representative  $\mu$ CT reconstructions central cross sections of the caudal vertebrae. Analysis of the cortical properties **(I)** bone volume (BV), **(J)** cortical tissue mineral density, **(K)** cross sectional thickness (Cs. Th.), **(L)** mean cross-sectional bone area (B. Ar.), **(M)** closed porosity, and **(N)** bone perimeter (B. Pm.) revealed cortical thinning of K<sub>3</sub>Citrate caudal vertebrae. (Control mice: n=7 mice (2F, 5M); K<sub>3</sub>Citrate mice: n=7 mice (3F, 4M); 2 vertebrae/mouse; 28 discs, 14 vertebrae/treatment) Data are shown as mean  $\pm$  SD. Significance was determined using an unpaired t-test or Mann-Whitney test, as appropriate. Multiplex assay analysis showed no significant changes in the plasma concentrations of **(O)** IFN- $\gamma$ , **(P)** IL-1 $\beta$ , **(Q)** IL-2, **(R)** IL-4, **(S)** IL-5, **(T)** IL-6, **(U)** IL-10, **(V)** IL-12/p70, **(W)** IL-15, **(X)** IL-17A/F, **(Y)** IL-27/p28/IL-30, **(Z)** IL-33, **(AA)** IP-10, **(BB)** KC/GRO, **(CC)** MCP-1, **(DD)** MIP-1 $\alpha$ , **(EE)** MIP-2, **(FF)** TNF- $\alpha$  (Control: n=6 mice (1F, 5M); K<sub>3</sub>Citrate: n=7 mice (3F, 4M)). Data are shown as mean  $\pm$  SD. Significance was determined using an unpaired t-test or Mann-Whitney test, as appropriate.

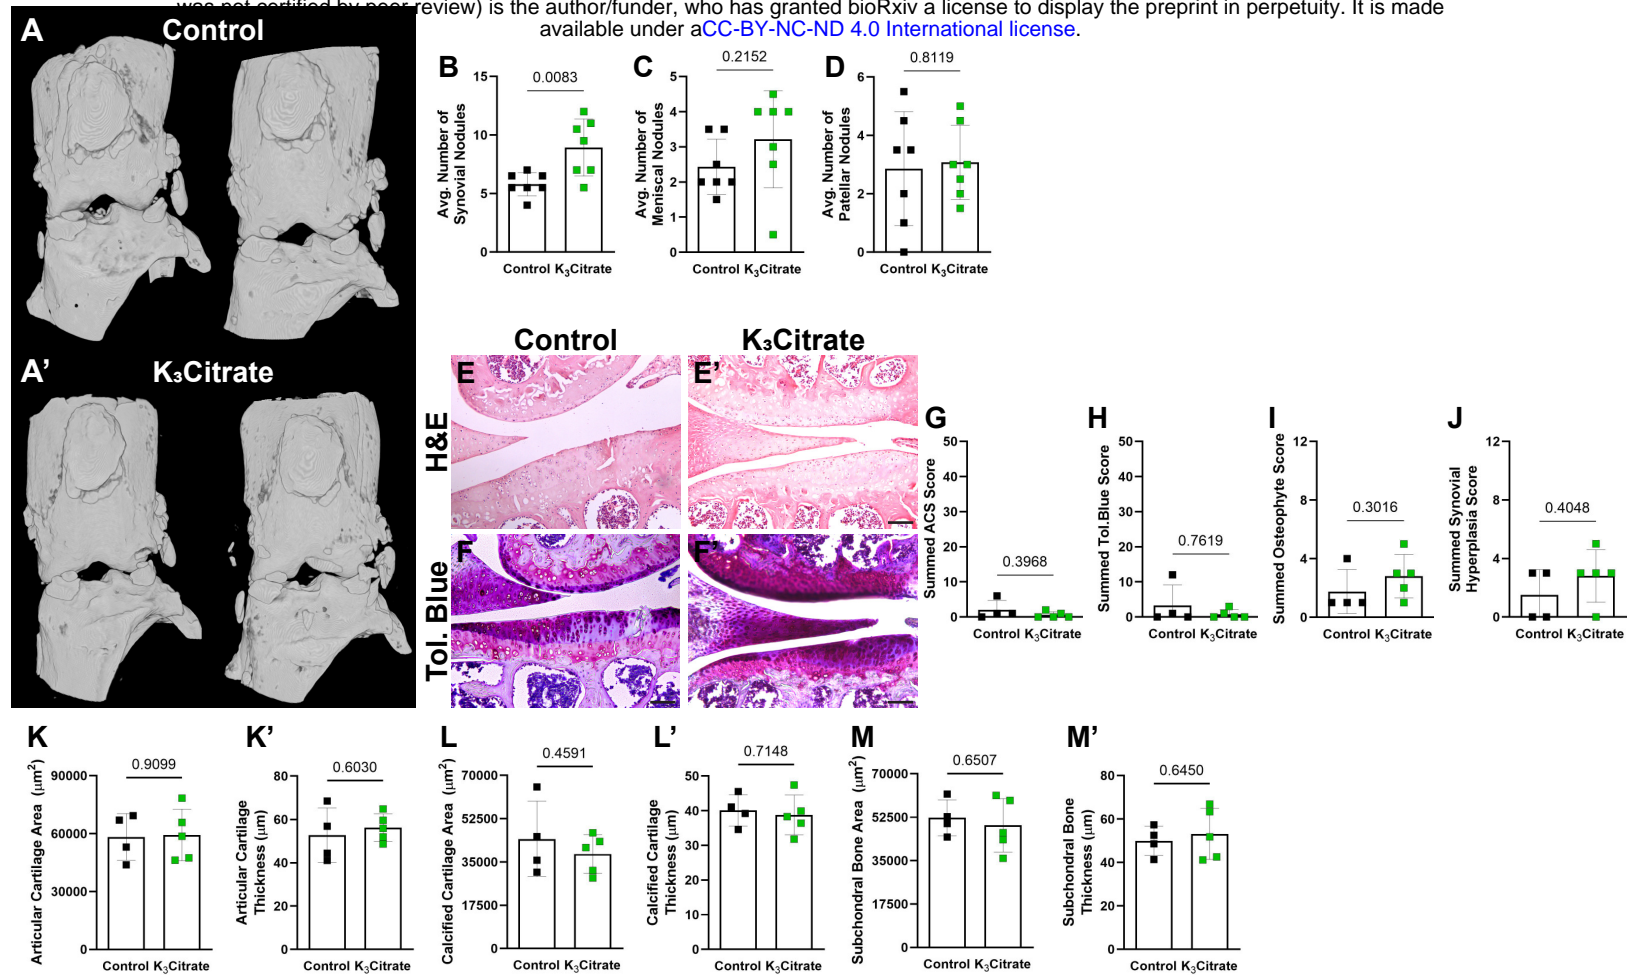

**Supplementary Figure 4. K<sub>3</sub>Citrate alters knee calcification without impact on cartilage and bone morphology.** (A-A') Representative  $\mu$ CT reconstructions of the knees of control and K<sub>3</sub>Citrate mice. Quantification of calcification nodules in the (B) synovium, (C) meniscus, and (D) patellar. (E-E') Representative hematoxylin and eosin (H&E) staining and (F-F') toluidine (Tol.) blue staining of the lateral tibial plateau. Summed (G) ACS score, (H) toluidine blue score, (I) osteophyte score, and (J) synovial hyperplasia score show no difference between cohorts. Additionally, K<sub>3</sub>Citrate supplementation did not result in changes to the area or thickness of (K-K') articular cartilage, (L-L') calcified cartilage, or (M-M') subchondral bone. (Control: n=4 mice (1F, 3M); K<sub>3</sub>Citrate: n=5 mice (3F, 2M)). Data are shown as mean  $\pm$  SD. Significance was determined using an unpaired t-test or Mann-Whitney test, as appropriate.



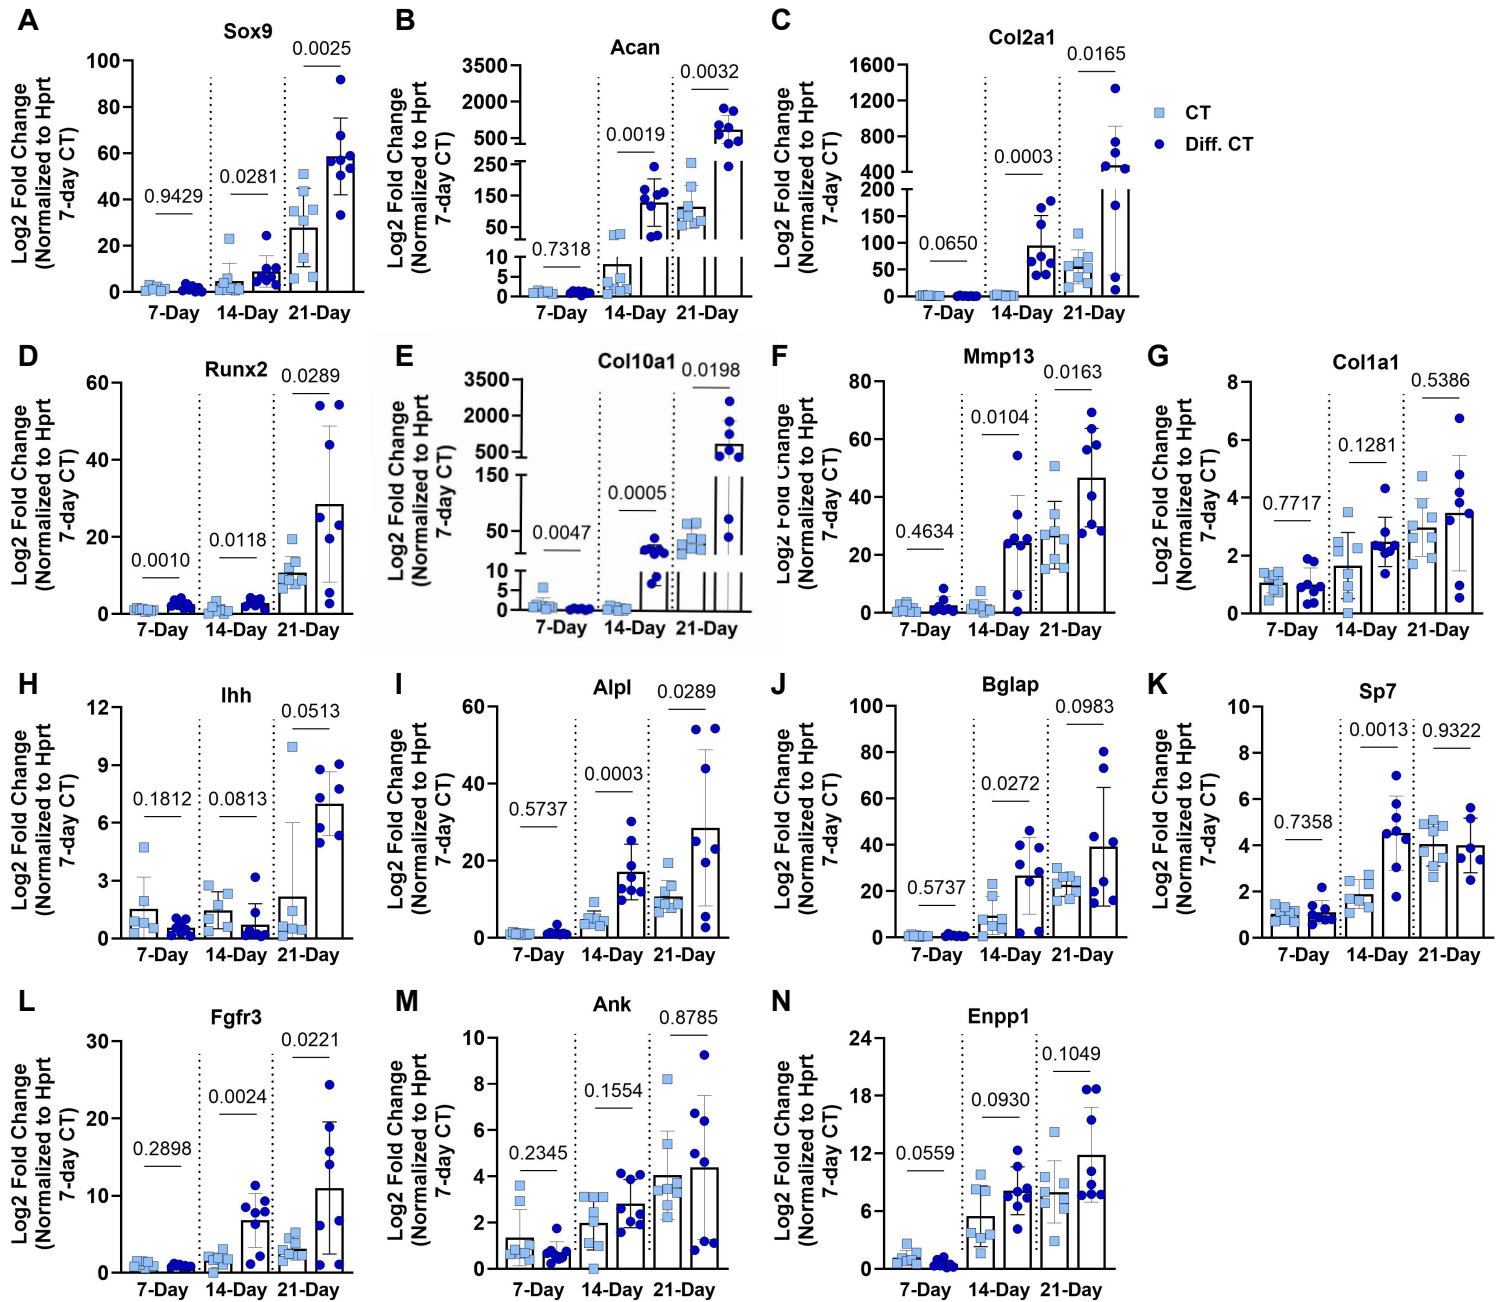

**Supplementary Figure 5. Validation of accelerated differentiation protocol in ATDC5 cells.** CT and Diff. CT treatment groups were compared for all chondrogenic markers assessed to verify accelerated differentiation in ATDC5 cells receiving  $\beta$ -glycerophosphate and ascorbic acid: **(A)** Sox9, **(B)** Acan, **(C)** Col2a1, **(D)** Runx2, **(E)** Col10a1, **(F)** Mmp13, **(G)** Col1a1, **(H)** Ihh, **(I)** Alpl, **(J)** Bglap, **(K)** Sp7, and **(L)** Fgfr3, **(M)** Ank, and **(N)** Enpp1. (n=8 sets/timepoint, 2 averaged replicates/set) Data are shown as mean  $\pm$  SD. Significance was determined using an unpaired t-test or Mann-Whitney test, as appropriate.

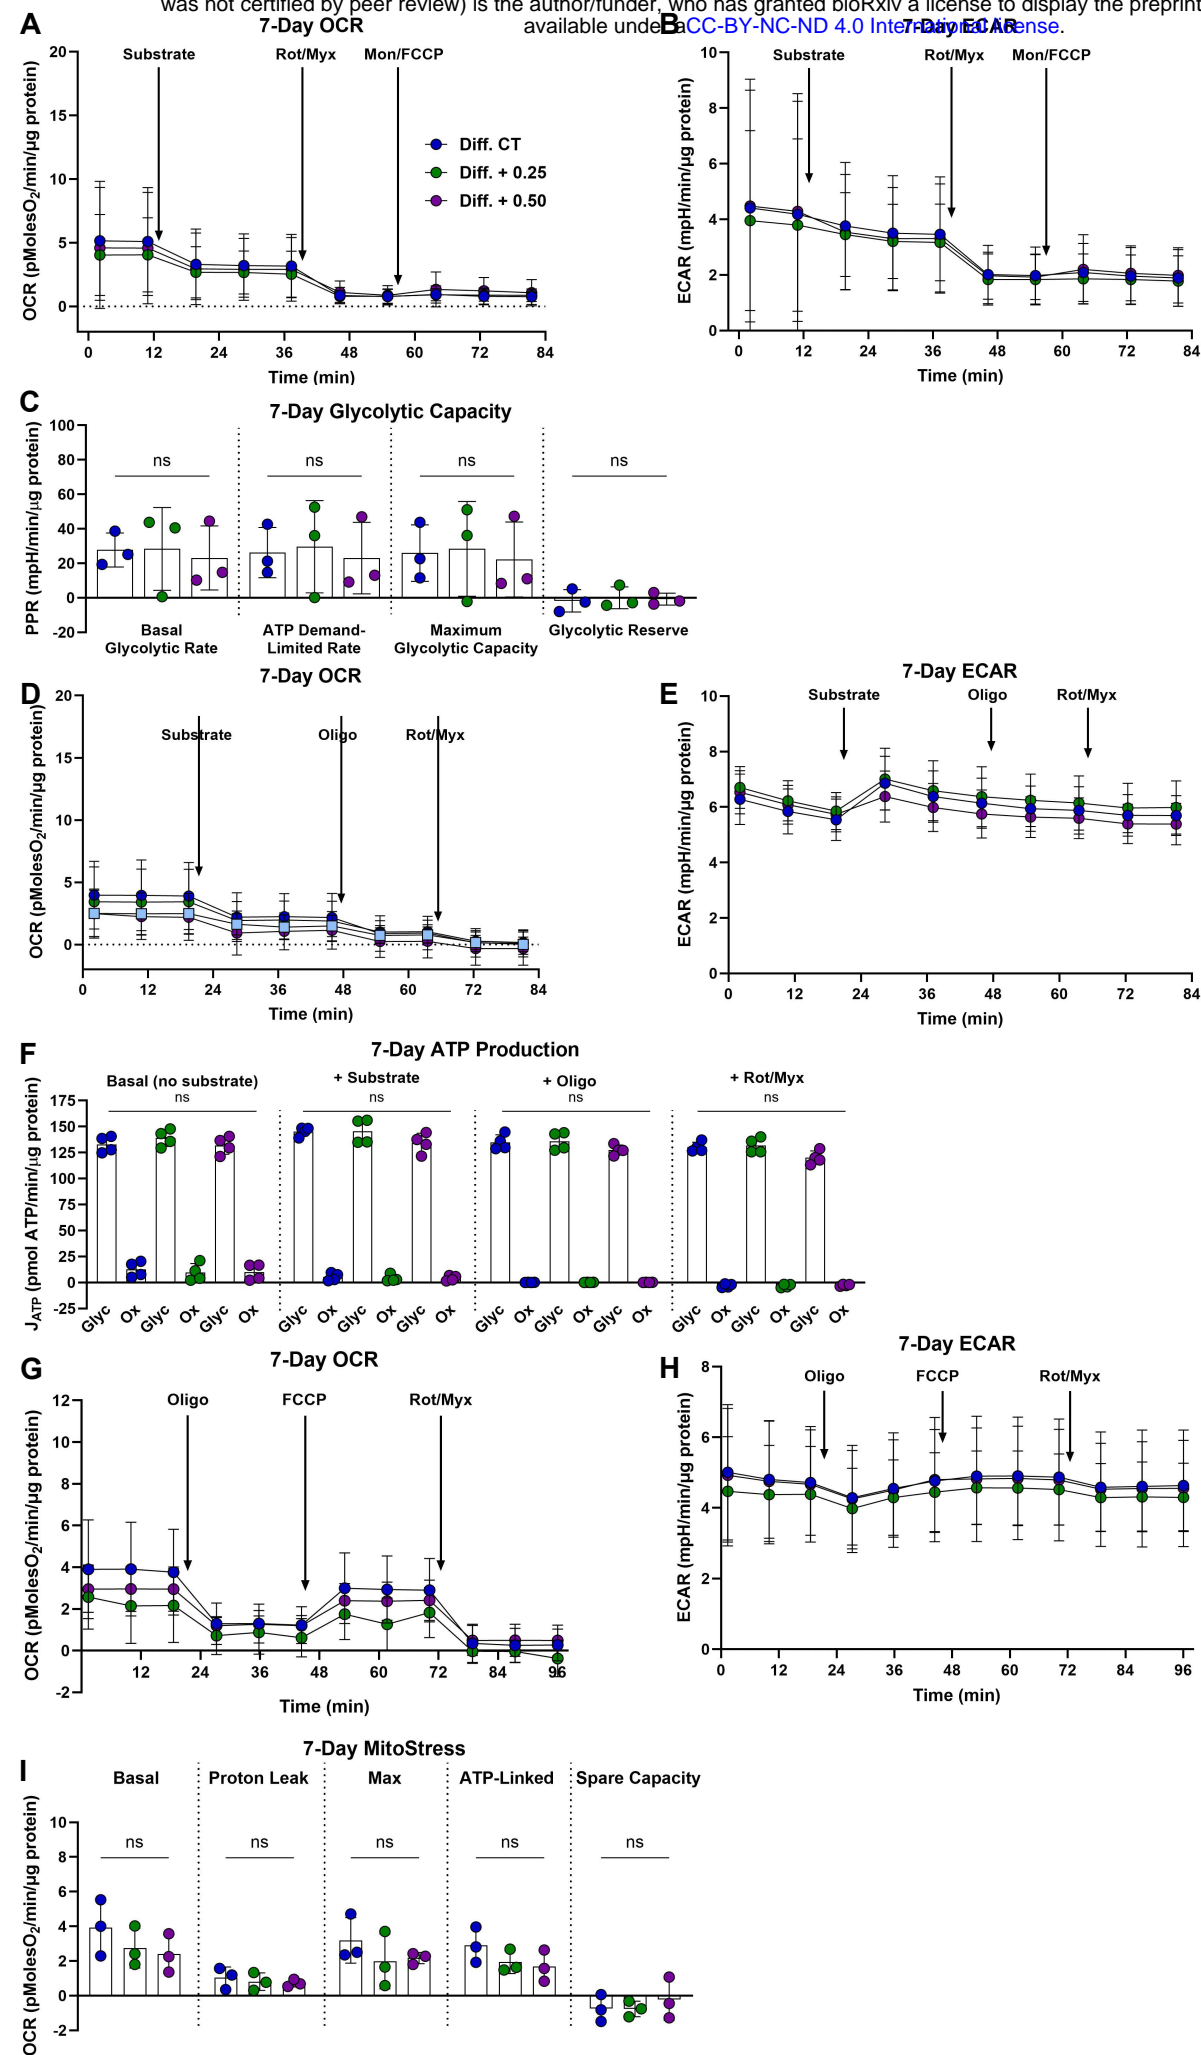

**Supplementary 6. K<sub>3</sub>Citrate supplementation does not impact glycolytic or oxidative metabolism in ATDC5 cells cultured for 7 days. (A) OCR and (B) ECAR traces for ATDC5 cells cultured with or without K<sub>3</sub>Citrate (C) to evaluate glycolytic capacity and glycolytic reserve. (D) OCR and (E) ECAR traces for ATDC5 cells cultured with or without K<sub>3</sub>Citrate (F) to evaluate glycolytic and oxidative ATP production rates. (G) OCR and (H) ECAR traces for ATDC5 cells cultured with or without K<sub>3</sub>Citrate (I) for the classical Mito Stress test to evaluate key parameters of mitochondrial function. (n = 3 sets, 3-4 replicates/set) Data are shown as mean ± SD. Significance was determined using an ANOVA or Kruskal-Wallis test, as appropriate.**
